# Supplementary material for: Trehalose increases tomato drought tolerance, induces defenses, and increases resistance to bacterial wilt disease
Source: PubMed Central journal article supplement (PMC9045674; doi:10.1371/journal.pone.0266254), 2022-04-27
Supplement: pone.0266254.s001.pdf [file pone.0266254.s001.pdf]

**Supplemental Table 1A. Strains and primers used in this study**

| <b>Strain</b>            | <b>Notes</b>                                                                                      | <b>Reference</b>                            |
|--------------------------|---------------------------------------------------------------------------------------------------|---------------------------------------------|
| Wild type<br>GMI1000     | <i>Ralstonia solanacearum</i> phylotype one sequevar 18,<br>isolated from tomato in French Guyana | (Boucher, Barberis et al.<br>1985)          |
| GMI1000<br>$\Delta treA$ | GMI1000 trehalase mutant cannot degrade trehalose;<br>Spectinomycin/streptomycin-resistant        | (MacIntyre, Barth et al.<br>2019)           |
| <b>Primer Name</b>       | <b>Sequence</b>                                                                                   | <b>Reference</b>                            |
| loxA F                   | TGGTAGACCACCAACACGAA                                                                              | (Milling, Babujee et al.<br>2011)           |
| loxA R                   | GACCAAAACGCTCGTCTCTC                                                                              | “                                           |
| osmF                     | TGTACCACGTTTGGAGGACA                                                                              | “                                           |
| osmR                     | ACCAGGGCAAGTAAATGTGC                                                                              | “                                           |
| PR1b B F                 | TTGGTGACTGCGGGATGA                                                                                | “                                           |
| PR1b B R                 | GGCGGCGGCTAGGTT T                                                                                 | “                                           |
| PR1a B F                 | GAGGGCAGCCGTGCAA                                                                                  | “                                           |
| PR1a B R                 | CACATTTTTCCACCAACACATTG                                                                           | “                                           |
| GluA F                   | TCA GCA GGG TTG CAA AAT CA                                                                        | “                                           |
| GluA R                   | CTCTAGGTGGGTAGGTGTTGGTTAA                                                                         | “                                           |
| Pin2 F                   | TGATGCCAAGGCTTGTACTAGAGA                                                                          | “                                           |
| Pin2 R                   | AGCGGACTTCCTTCTGAACGT                                                                             | “                                           |
| ACO5 F                   | AGATGGGCATTGGGTGAACA                                                                              | “                                           |
| ACO5 R                   | TTCAGCCATCACTCGGTGTC                                                                              | “                                           |
| DnaJ F                   | ATGAAGCGCCAGATACCATC                                                                              | “                                           |
| DnaJ R                   | TCAAGGCTCAATGTGTGCTC                                                                              | “                                           |
| Actin F                  | TCAGCAACTGGGATGATATG                                                                              | “                                           |
| Actin R                  | TTAGGGTTGAGAGGTGCTTC                                                                              | “                                           |
| rd22_F                   | ACGTGGCGTTATTTTCCTG                                                                               | (Yamaguchi-Shinozaki<br>and Shinozaki 1993) |
| rd22_R                   | ATCTCCGGCATCTTCTCTGA                                                                              | “                                           |
| dhn_tas_F                | CACCATGAGGGGCAACAGCA                                                                              | (Kissoudis, Seifi et al.<br>2016)           |
| dhn_tas_R                | TCACCTTCATGTTGTCCAGGCATC                                                                          | “                                           |
