# Supplementary material for: Trehalose increases tomato drought tolerance, induces defenses, and increases resistance to bacterial wilt disease
Source: PubMed Central journal article supplement (PMC9045674; doi:10.1371/journal.pone.0266254), 2022-04-27
Supplement: pone.0266254.s002.pdf [file pone.0266254.s002.pdf]

**Supplemental Table 1B. Concentration of hormones, oxylipins, and phenylpropanoids in tomato xylem sap following various treatments**

| Compound (nM) <sup>a</sup> | Healthy Avg <sup>b</sup> | WT avg <sup>c</sup> | WT FC <sup>d</sup> | WT p-val <sup>e</sup> | 6 hr tre avg <sup>f</sup> | 6 hr tre FC | 6 hr tre p-val | 24 hr tre avg <sup>g</sup> | 24 hr tre FC | 24 hr tre p-val | 48 hr tre avg <sup>h</sup> | 48 hr tre FC | 48 hr tre p-val |
|----------------------------|--------------------------|---------------------|--------------------|-----------------------|---------------------------|-------------|----------------|----------------------------|--------------|-----------------|----------------------------|--------------|-----------------|
| 12,13-diHOM                | 0.83                     | 1.30                | 2                  | 0.04                  | 1.26                      | 2           | 0.27           | 2.69                       | 3            | 0.00            | 1.50                       | 2            | 0.02            |
| 12,13-Ep-9KOM              | 5.38                     | 6.86                | 1                  | 0.24                  | 7.93                      | 1           | 0.02           | 4.82                       | 1            | 0.64            | 7.62                       | 1            | 0.04            |
| 12OH-JA                    | 1.43                     | 1.70                | 1                  | 0.63                  | 5.21                      | 4           | 0.30           | 1.38                       | 1            | 0.84            | 1.17                       | 1            | 0.06            |
| 12OH-JA-Ile                | 12.37                    | 15.23               | 1                  | 0.81                  | 20.67                     | 2           | 0.29           | 22.97                      | 2            | 0.14            | 57.67                      | 5            | 0.00            |
| 12-OPDA                    | 35.86                    | 47.89               | 1                  | 0.44                  | 50.75                     | 1           | 0.43           | 138.72                     | 4            | 0.00            | 91.84                      | 3            | 0.01            |
| 13-HOD                     | 4.66                     | 8.52                | 2                  | 0.00                  | 5.09                      | 1           | 0.66           | 9.02                       | 2            | 0.01            | 5.49                       | 1            | 0.14            |
| 13-KOD                     | 4.50                     | 10.78               | 2                  | 0.01                  | 6.27                      | 1           | 0.31           | 9.72                       | 2            | 0.00            | 5.81                       | 1            | 0.12            |
| 13,12-KODA                 | 0.27                     | 0.75                | 3                  | 0.34                  | 0.11                      | 0           | 0.37           | 4.89                       | 18           | 0.00            | 0.22                       | 1            | 0.80            |
| 13,12-KOMA                 | 1.78                     | 3.18                | 2                  | 0.23                  | 1.23                      | 1           | 0.47           | 9.67                       | 5            | 0.00            | 2.23                       | 1            | 0.58            |
| 2-HOD                      | 0.24                     | 0.35                | 1                  | 0.44                  | 0.36                      | 1           | 0.18           | 0.30                       | 1            | 0.55            | 0.29                       | 1            | 0.66            |
| 9,10,11-THOD               | 88.94                    | 191.22              | 2                  | 0.02                  | 134.71                    | 2           | 0.09           | 214.49                     | 2            | 0.00            | 153.30                     | 2            | 0.02            |
| 9,10,11-THOM               | 237.57                   | 811.16              | 3                  | 0.00                  | 430.01                    | 2           | 0.02           | 572.57                     | 2            | 0.00            | 379.05                     | 2            | 0.00            |
| 9,10,13-THOD               | 3.47                     | 4.47                | 1                  | 0.28                  | 9.91                      | 3           | 0.00           | 5.78                       | 2            | 0.00            | 6.06                       | 2            | 0.02            |
| 9,10,13-THOM               | 62.08                    | 100.56              | 2                  | 0.03                  | 147.39                    | 2           | 0.00           | 128.47                     | 2            | 0.00            | 96.87                      | 2            | 0.01            |
| 9,10-diHOM                 | 0.95                     | 1.25                | 1                  | 0.43                  | 1.48                      | 2           | 0.52           | 3.64                       | 4            | 0.00            | 1.02                       | 1            | 0.86            |
| 9,12,13-THOD               | 39.77                    | 50.62               | 1                  | 0.18                  | 43.68                     | 1           | 0.56           | 84.76                      | 2            | 0.00            | 60.09                      | 2            | 0.02            |
| 9,12,13-THOM               | 127.69                   | 231.37              | 2                  | 0.01                  | 153.78                    | 1           | 0.36           | 305.89                     | 2            | 0.00            | 179.49                     | 1            | 0.04            |
| 9-HOD                      | 6.15                     | 21.29               | 3                  | 0.01                  | 10.27                     | 2           | 0.02           | 14.60                      | 2            | 0.00            | 8.64                       | 1            | 0.17            |
| 9-HOT                      | 3.04                     | 9.78                | 3                  | 0.03                  | 5.02                      | 2           | 0.16           | 9.75                       | 3            | 0.00            | 4.87                       | 2            | 0.12            |
| 9-KOD                      | 4.35                     | 8.90                | 2                  | 0.15                  | 6.60                      | 2           | 0.34           | 19.32                      | 4            | 0.00            | 12.16                      | 3            | 0.00            |
| 9-KOT                      | 1.06                     | 3.68                | 3                  | 0.17                  | 5.51                      | 5           | 0.05           | 7.61                       | 7            | 0.00            | 3.90                       | 4            | 0.05            |
| 9OH-10KOM                  | 8.81                     | 5.36                | 1                  | 0.07                  | 10.81                     | 1           | 0.15           | 9.05                       | 1            | 0.88            | 8.97                       | 1            | 0.92            |
| 9OH-12KOD                  | 0.20                     | 0.13                | 1                  | 0.51                  | 0.27                      | 1           | 0.53           | 0.69                       | 4            | 0.00            | 0.34                       | 2            | 0.02            |
| 9OH-12KOM                  | 1.88                     | 2.48                | 1                  | 0.03                  | 2.96                      | 2           | 0.24           | 3.97                       | 2            | 0.00            | 2.11                       | 1            | 0.36            |
| 9-oxo-NA                   | 13.94                    | 17.47               | 1                  | 0.37                  | 16.53                     | 1           | 0.56           | 16.06                      | 1            | 0.51            | 17.25                      | 1            | 0.32            |
| ABA                        | 8.20                     | 49.59               | 6                  | 0.03                  | 5.71                      | 1           | 0.60           | 40.37                      | 5            | 0.00            | 9.72                       | 1            | 0.73            |

| Compound (nM) <sup>a</sup> | Healthy Avg <sup>b</sup> | WT avg <sup>c</sup> | WT FC <sup>d</sup> | WT p-val <sup>e</sup> | 6 hr tre avg <sup>f</sup> | 6 hr tre FC | 6 hr tre p-val | 24 hr tre avg <sup>g</sup> | 24 hr tre FC | 24 hr tre p-val | 48 hr tre avg <sup>h</sup> | 48 hr tre FC | 48 hr tre p-val |
|----------------------------|--------------------------|---------------------|--------------------|-----------------------|---------------------------|-------------|----------------|----------------------------|--------------|-----------------|----------------------------|--------------|-----------------|
| AZA                        | 14.08                    | 19.39               | 1                  | 0.11                  | 19.21                     | 1           | 0.00           | 20.44                      | 1            | 0.00            | 18.03                      | 1            | 0.01            |
| BA                         | 7.18                     | 12.37               | 2                  | 0.13                  | 11.34                     | 2           | 0.19           | 13.29                      | 2            | 0.00            | 9.74                       | 1            | 0.02            |
| CA                         | 7.49                     | 5.19                | 1                  | 0.52                  | 5.30                      | 1           | 0.56           | 22.69                      | 3            | 0.00            | 14.19                      | 2            | 0.16            |
| COUMA                      | 2.04                     | 149.10              | 73                 | 0.05                  | 2.42                      | 1           | 0.83           | 5.22                       | 3            | 0.11            | 0.00                       | 0            | 0.12            |
| dnOPDA                     | 0.12                     | 0.21                | 2                  | 0.25                  | 0.26                      | 2           | 0.02           | 0.53                       | 4            | 0.00            | 0.44                       | 4            | 0.00            |
| IAA                        | 3.26                     | 36.76               | 11                 | 0.03                  | 2.84                      | 1           | 0.59           | 4.01                       | 1            | 0.29            | 2.20                       | 1            | 0.09            |
| JA                         | 16.71                    | 9.42                | 1                  | 0.22                  | 26.64                     | 2           | 0.33           | 49.41                      | 3            | 0.01            | 71.36                      | 4            | 0.00            |
| JA-Ile                     | 26.59                    | 3.67                | 0                  | 0.09                  | 35.48                     | 1           | 0.62           | 60.08                      | 2            | 0.04            | 103.68                     | 4            | 0.00            |
| OPC-4                      | 0.31                     | 0.53                | 2                  | 0.09                  | 0.52                      | 2           | 0.13           | 1.09                       | 4            | 0.00            | 1.05                       | 3            | 0.00            |
| p12,13-DiHOD*              | 0.16                     | 0.91                | 6                  | 0.00                  | 0.85                      | 5           | 0.05           | 0.82                       | 5            | 0.00            | 0.18                       | 1            | 0.69            |
| p9,10-DiHOD*               | 0.63                     | 1.75                | 3                  | 0.02                  | 1.48                      | 2           | 0.04           | 1.73                       | 3            | 0.01            | 0.91                       | 1            | 0.42            |
| p9OH-TAN*                  | 3.62                     | 3.35                | 1                  | 0.62                  | 3.36                      | 1           | 0.71           | 8.86                       | 2            | 0.00            | 4.07                       | 1            | 0.46            |
| pOTD*                      | 0.47                     | 0.42                | 1                  | 0.72                  | 0.52                      | 1           | 0.71           | 1.19                       | 3            | 0.00            | 0.36                       | 1            | 0.33            |
| SA                         | 67.53                    | 31.73               | 0                  | 0.21                  | 55.50                     | 1           | 0.69           | 173.44                     | 3            | 0.01            | 55.09                      | 1            | 0.65            |
| TA                         | 6.03                     | 10.56               | 2                  | 0.04                  | 7.94                      | 1           | 0.19           | 17.41                      | 3            | 0.00            | 7.35                       | 1            | 0.23            |
| TAN                        | 0.54                     | 0.77                | 1                  | 0.32                  | 0.53                      | 1           | 0.91           | 0.74                       | 1            | 0.01            | 0.60                       | 1            | 0.51            |

<sup>a</sup> Compound color key: Blue fill= 13-LOX pathway derived compound; Red fill= 9-LOX pathway derived compound; Purple fill= phenylpropanoid pathway derived compound; Gray fill= other; metabolites were measured with LC/MS/MS

<sup>b</sup> Xylem sap harvested from mock-inoculated/treated healthy BB plants

<sup>c</sup> Sap harvested from DI=1 *Rs* infected plants

<sup>d</sup> Fold-change values  $\geq 2$  are shaded in light red with dark red text.

<sup>e</sup> P-value derived from t-test of treatment compared to healthy;  $P < 0.5$  was shaded yellow with darker yellow text.

<sup>f-g</sup> Xylem sap harvested from uninoculated, trehalose treated plants 6, 24, and 48 h post-treatment
