# Supplementary material for: Trehalose increases tomato drought tolerance, induces defenses, and increases resistance to bacterial wilt disease
Source: PubMed Central journal article supplement (PMC9045674; doi:10.1371/journal.pone.0266254), 2022-04-27
Supplement: pone.0266254.s003.pdf [file pone.0266254.s003.pdf]

Supplemental Table 1C. Metabolite key for hormone analysis

| Q1 <sup>a</sup> | Q3 <sup>b</sup> | RT <sup>c</sup> | Metabolite   | Formal Name                                                  |
|-----------------|-----------------|-----------------|--------------|--------------------------------------------------------------|
| 313.3           | 183.3           | 10.16           | 12,13-DiHOM  | threo-12,13-dihydroxy-9(Z)-octadecenoic acid                 |
| 309.4           | 208.9           | 12.46           | (E)-KODA     | 12,13-epoxy-9-oxo-10(E)-octadecenoic acid                    |
| 225             | 59              | 2.44            | 12OH-JA      | 12-hydroxy-jasmonic acid                                     |
| 338.3           | 130.1           | 3.19            | 12OH-JA-Ile  | 12-hydroxy-jasmonic acid isoleucine                          |
| 291.3           | 165             | 11.13           | 12-OPDA      | 12-oxo-10(Z),15(Z)-phytydienoic acid                         |
| 295.3           | 195.2           | 13.46           | 13-HOD       | 13(S)-hydroxy-9(Z),11(E)-octadecatrienoic acid               |
| 293.2           | 113.2           | 14.16           | 13-KOD       | 13-oxo-9(Z),11(E)-octadecadienoic acid                       |
| 309.4           | 180.8           | 10.32           | 13,12-KODA   | 13-hydroxy-12-oxo-9(Z),15(Z)-octadecadienoic acid            |
| 311.3           | 194.9           | 11.42           | 13,12-KOMA   | 13-hydroxy-12-oxo-9(Z)-octadecenoic acid                     |
| 293.2           | 191.1           | 15.15           | 2-HOD        | 2-hydroxy-9(Z),15(Z)-octadecadienoic acid                    |
| 327.1           | 137             | 5.57            | 9,10,11-THOD | 9(S),10(S),11(R)-trihydroxy-12(Z),15(Z)-octadecadienoic acid |
| 329.5           | 201             | 6.69            | 9,10,11-THOM | 9(S),10(S),11(R)-trihydroxy-12(Z)-octadecenoic acid          |
| 327.1           | 137             | 4.94            | 9,10,13-THOD | 9(S),10(S),13(S)-trihydroxy-11(E),15(Z)-octadecadienoic acid |
| 329.5           | 139             | 5.8             | 9,10,13-THOM | 9(S),10(S),13(S)-trihydroxy-11(E)-octadecenoic acid          |
| 313.2           | 201.2           | 10.46           | 9,10-DiHOM   | threo-9,10-dihydroxy-12(Z)-octadecenoic acid                 |
| 326.9           | 229.1           | 5               | 9,12,13-THOD | 9(S),12(S),13(S)-trihydroxy-10(E),15(Z)-octadecadienoic acid |
| 329.5           | 210.9           | 5.74            | 9,12,13-THOM | 9(S),12(S),13(S)-trihydroxy-10(E)-octadecenoic acid          |
| 295.3           | 171.1           | 13.53           | 9-HOD        | 9(S)-hydroxy-10(E),12(Z)-octadecadienoic acid                |
| 293.2           | 171.2           | 12.04           | 9-HOT        | 9(S)-hydroxy-10(E),12(Z),15(Z)-octadecatrienoic acid         |
| 293.2           | 195.1           | 12.25           | 9-KOD        | 9(S)-oxo-10(E),12(Z)-octadecatrienoic acid                   |
| 291.3           | 184.7           | 13.04           | 9-KOT        | 9(S)-oxo-10(E),12(Z),15(Z)-octadecatrienoic acid             |
| 311.3           | 293.2           | 11.76           | 9,10-KOMA    | 9-hydroxy-10-oxo-12(Z)-octadecadienoic acid                  |
| 309.1           | 291.3           | 9.02            | 9,12-KODA    | 9-hydroxy-12-oxo-10(E),15(Z)-octadecadienoic acid            |
| 311.3           | 293.1           | 10.29           | 9,12-KOMA    | 9-hydroxy-12-oxo-10(E)-octadecenoic acid                     |
| 263.4           | 153.1           | 3.33            | ABA          | Abscisic acid                                                |
| 186.9           | 124.9           | 2.83            | AZA          | Azelaic Acid                                                 |
| 121.1           | 76.9            | 2.54            | BA           | Benzoic acid                                                 |
| 147             | 102.9           | 3.6             | CA           | Cinnamic acid                                                |
| 162.9           | 118.9           | 2.05            | COUMA        | Coumaric acid                                                |
| 263.1           | 165             | 8.29            | dn-12-OPDA   | dinor-12-oxo-8(Z),13(Z)-phytydienoic acid                    |
| 174             | 129.9           | 2.77            | IAA          | Indole-3-acetic acid                                         |
| 209.1           | 59              | 4.24            | JA           | (+)-7-iso-jasmonic acid                                      |
| 322.2           | 130             | 6.82            | JA-Ile       | (+)-7-Jasmonoyl-L-isoleucine                                 |
| 237             | 165.1           | 6.38            | OPC-4        | 8-[3-oxo-2-cis-[(Z)-2-pentenylcyclopentyl]butanoic acid      |
| 311.2           | 183.2           | 10.3            | 12,13-DiHOD* | threo-12,13-dihydroxy-9(Z),15(Z)-octadecenoic acid           |
| 311.2           | 201.2           | 10.35           | 9,10-DiHOD*  | threo-9,10-dihydroxy-12(Z),15(Z)-octadecenoic acid           |
| 226.9           | 208.7           | 3.2             | 9OH-TAN*     | 9-hydroxy-12-oxo-10(E)-dodecenoic acid                       |
| 223             | 195             | 7.3             | OTD*         | 13-oxo-9(Z),11(E)-tridecadienoic acid                        |
| 137             | 92.9            | 2.45            | SA           | Salicylic acid                                               |
| 226.9           | 182.7           | 5.36            | TA           | Traumatic acid                                               |
| 210.9           | 182.7           | 6.56            | TAN          | Traumatin                                                    |

<sup>A-B</sup> Select m/z ions for compound identification (see Methods section)

<sup>C</sup> Compound retention time
