# Supplementary material for: Trehalose increases tomato drought tolerance, induces defenses, and increases resistance to bacterial wilt disease
Source: PubMed Central journal article supplement (PMC9045674; doi:10.1371/journal.pone.0266254), 2022-04-27
Supplement: pone.0266254.s006.pdf [file pone.0266254.s006.pdf]

MacIntyre et al **Trehalose increases tomato drought tolerance, induces defenses, and increases resistance to bacterial wilt disease**

**Supplemental Figure 3**

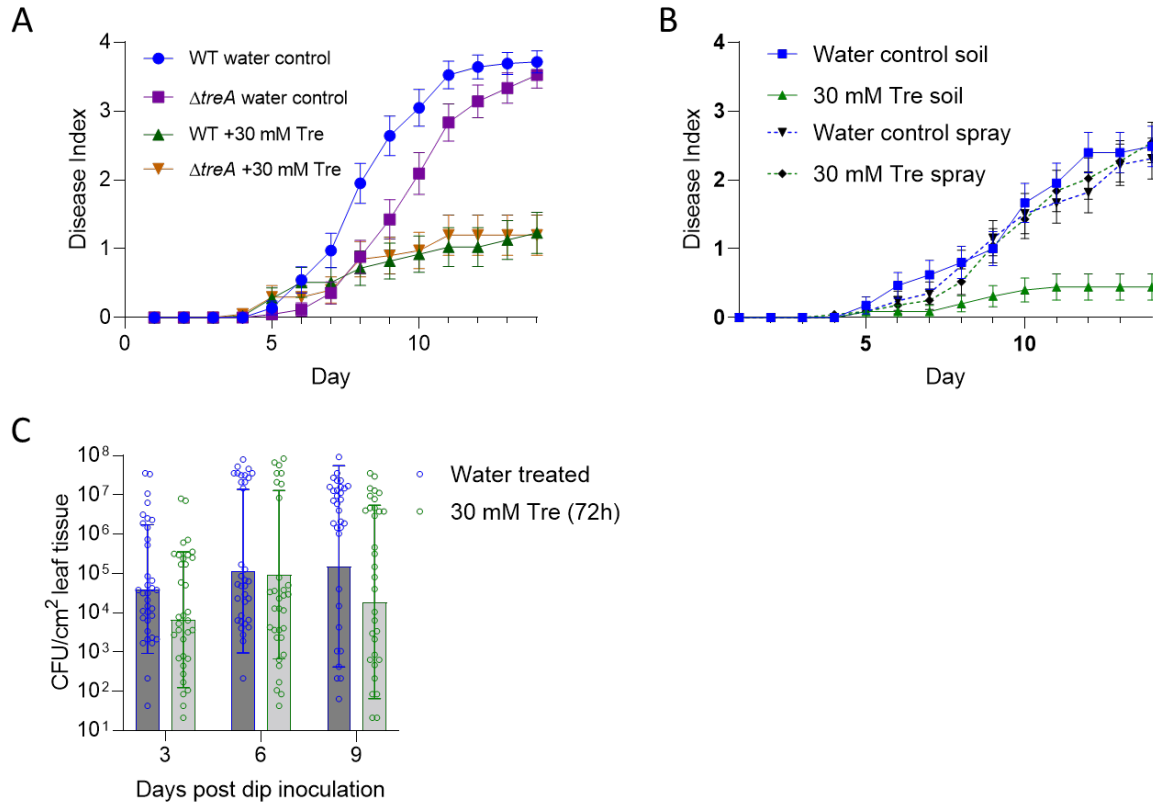

**Supplemental Figure 3. Trehalose treatment does not nutritionally enrich the soil environment for *R.***

***solanacearum*, and its protection is limited to root application. A)** Disease progress curve of plants treated with trehalose or water, then infected with either wild-type *R*s or a  $\Delta treA$  mutant unable to catabolize trehalose (one-way ANOVA of areas under the curve, WT H<sub>2</sub>O vs. WT tre,  $P=.$ 0008,  $\Delta treA$  H<sub>2</sub>O vs.  $\Delta treA$  tre,  $P=.$ 017). The data represent three bioreps each containing 13-15 plants per treatment. The bars represent the standard error. **B)** Disease development in plants sprayed once with 30 mM trehalose or water, and then soil-soak inoculated with *R*s 48 h later (ANOVA of AUC, Fisher's LSD multiple comparisons to H<sub>2</sub>O soil, H<sub>2</sub>O spray,  $P=.$ 67; tre spray,  $P=.$ 63; tre soil,  $P=.$ 63). The data represent three biological replicates each containing fifteen plants per treatment. The bars represent the standard error. **C)** Colonization of tomato leaves by the bacterial leaf spot pathogen *Xanthomonas gardneri*; plants were dip-inoculated with *X. gardneri* 72 h after root treatment with water or 30 mM trehalose (Mann-Whitney, day 3,  $P=.$ 06; day 6,  $P=.$ 61; day 9,  $P=.$ 08). The data represent three biological replicates with

twelve plants/treatment/timepoint. The graph displays the geometric means; bars indicate the geometric standard deviation of the data.
